# Supplementary material
Source: PubMed Central journal article supplement (PMC3289386)
Supplement: 1119000109_pnas.201119000SI.pdf [file 1119000109_pnas.201119000SI.pdf]

# Supporting Information

Zhou et al. 10.1073/pnas.1119000109

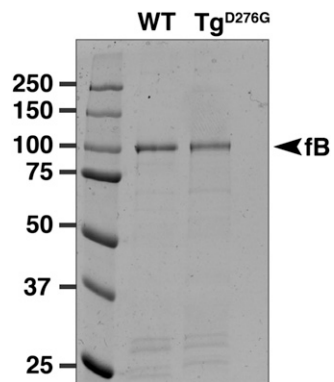

**Fig. S1.** Purification of factor B (fB) from fB<sup>D276G</sup> transgenic mice. fB from WT and transgenic (Tg) mice was purified by affinity chromatography using an anti-human/mouse fB monoclonal antibody. Aggregated materials and minor contaminants were removed by gel filtration on Superdex 200. Protein purity was verified by SDS/PAGE.
